# Supplementary material for: Plasticity in astrocyte subpopulations regulates heroin relapse
Source: PubMed Central journal article supplement — Sci Adv. 2022 Aug 10;8(31):eabo7044. doi: 10.1126/sciadv.abo7044 (PMC9365285; doi:10.1126/sciadv.abo7044), 2022-08-10
Supplement: sciadv.abo7044_sm.pdf [file sciadv.abo7044_sm.pdf]

Supplementary Materials for  
**Plasticity in astrocyte subpopulations regulates heroin relapse**

Anna Kruyer *et al.*

Corresponding author: Anna Kruyer, [kruyer@musc.edu](mailto:kruyer@musc.edu)

*Sci. Adv.* **8**, eabo7044 (2022)  
DOI: 10.1126/sciadv.abo7044

**This PDF file includes:**

Figs. S1 to S7  
Table S1

## SUPPLEMENTARY MATERIALS

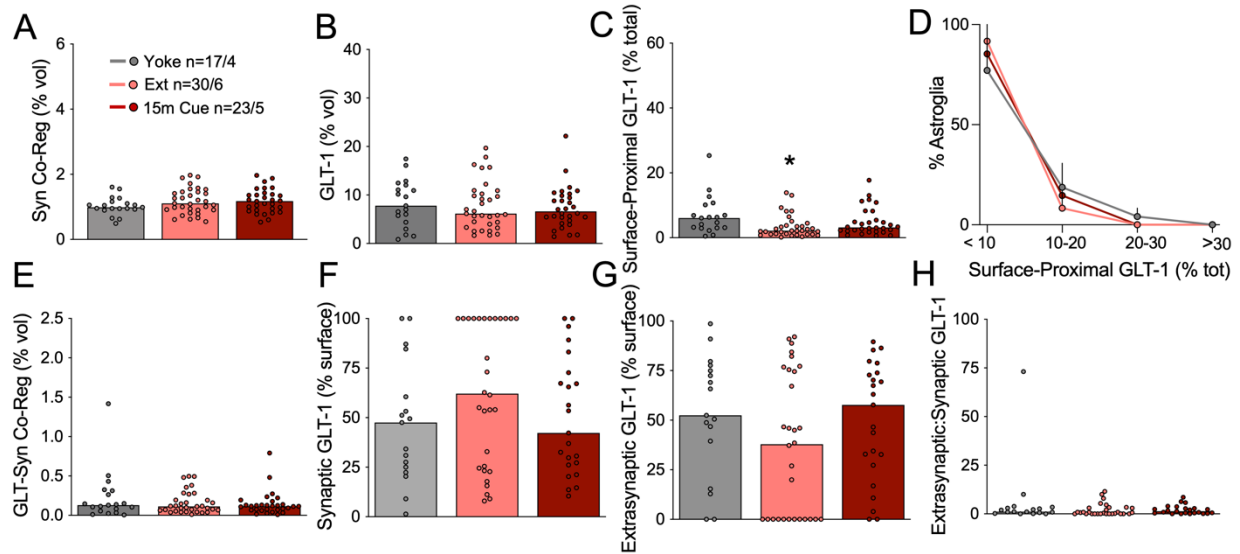

**Fig. S1. Astrocyte motility and GLT-1 expression were unchanged during reinstated sucrose seeking.** Co-registration of labeled NAcore astroglia with Synapsin I was not changed after extinction of sucrose self-administration or during 15 min of cue-reinstated sucrose seeking (**A**, Kruskal-Wallis=2.153,  $p=0.341$ ). (**B**) GLT-1 expression was unchanged after operant training with sucrose (Kruskal-Wallis=0.7336,  $p=0.693$ ). (**C**) Surface-proximal GLT-1, shown as percent of total GLT-1 from each astrocyte, was reduced after extinction from sucrose self-administration (Kruskal-Wallis=8.056,  $p<0.05$ ). (**D**) Cued reinstatement of sucrose seeking did not change the proportion of astroglia expressing high levels of surface-proximal GLT-1 (<10%: Kruskal-Wallis=1.464,  $p=0.4865$ ; 10-20%: Kruskal-Wallis=1.298,  $p=0.5428$ ; 20-30%: Kruskal-Wallis=2.75,  $p=0.2667$ ). (**E**) Co-registration of GLT-1 with the presynaptic marker Synapsin I was not changed by sucrose training (Kruskal-Wallis=0.3724,  $p=0.830$ ). When synaptic (**F**, Kruskal-Wallis=2.950) and extrasynaptic (**G**, Kruskal-Wallis=2.950) fractions of surface GLT-1 were analyzed separately, we found no change in sucrose-trained rats compared with yoked controls. (**H**) shows ratio of extrasynaptic:synaptic GLT-1 (Kruskal-Wallis=2.950). N shown in (**A**) as cells/animals. \* $p<0.05$  compared to yoked control using Dunn's test. Yoked, yoked cues; Ext, extinguished; 15m Cue, 15-min cued reinstatement.

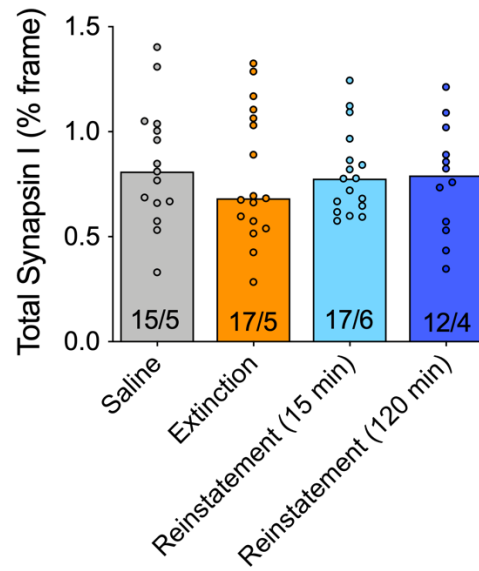

**Fig. S2. Heroin self-administration and extinction training did not impact Synapsin I immunoreactivity in the NAcore.** Kruskal-Wallis=0.4046,  $p=0.9393$ . N shown in bars as frames/animal.

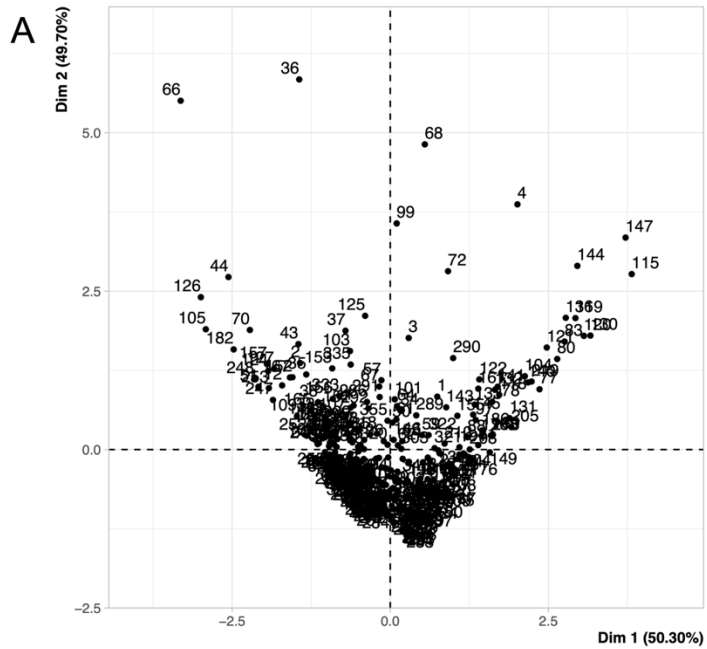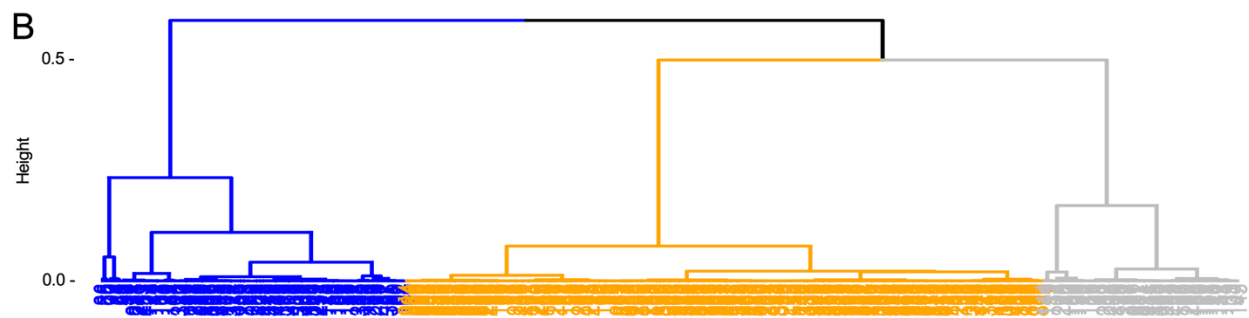

**Fig. S3. (A)** Principal component analysis showing individual data points organized according to dimensions 1 and 2, which account for 50.3% and 49.7% of the data variance, respectively. **(B)** Dendrogram shows three clusters representing type 1 (blue), type 2 (gray), and type 3 (orange) astroglia.

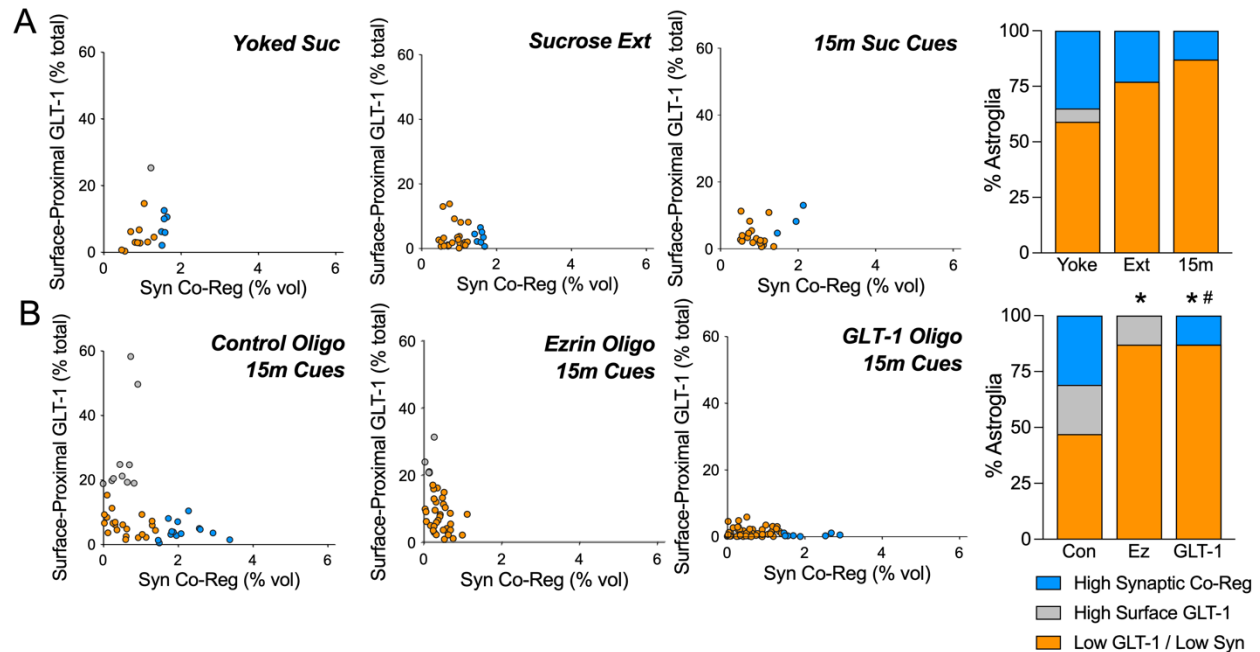

**Fig. S4. Astroglial subpopulations were not altered by operant training with sucrose, but were abolished by ezrin or GLT-1 oligo treatment. (A)** Astroglial clusters were not altered by operant training with sucrose ( $\chi^2=2.818$   $p=0.2444$  Yoke vs. Ext,  $\chi^2=4.535$   $p=0.1036$  Yoke vs. 15m). **(B)** Compared with astroglial subpopulations during reinstatement after control oligo treatment (left), ezrin or GLT-1 oligo treatment abolished subpopulations characterized by high synaptic adjacency (blue) or high surface-proximal GLT-1 (gray), respectively ( $\chi^2=17.87$   $*p=0.0002$  Ez vs. Con,  $\chi^2=23.60$   $*p<0.001$  GLT-1 vs. Con,  $\chi^2=13.01$   $\#p=0.003$  GLT-1 vs. Ez). In **(A, right panel)**, Yoke, yoked cues; Ext, extinguished; 15m, 15-min cued reinstatement. In **(B, right panel)**, Con, control oligo; Ez, ezrin oligo; GLT-1, GLT-1 oligo.

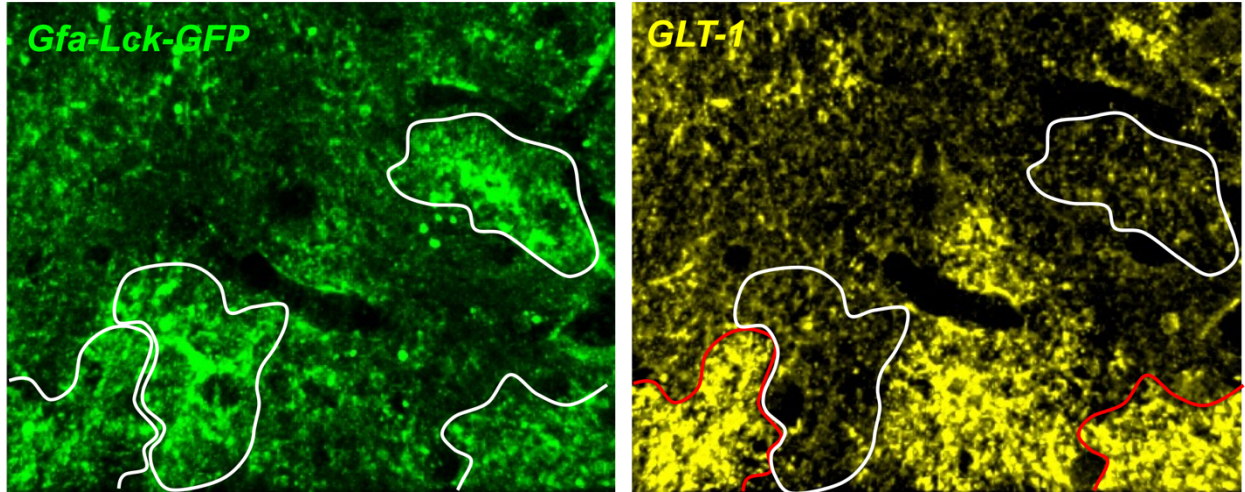

**Fig. S5.** Astroglial transduction with AAV5/GfaABC1D-Lck-GFAP labeled the astroglial membrane (green). Astrocytes identified using this marker are outlined in white (left panel). (Right panel) In the same frame, immunolabeling for GLT-1 (yellow) shows astrocytes with high (red outline) and low levels of GLT-1 expression (white outline).

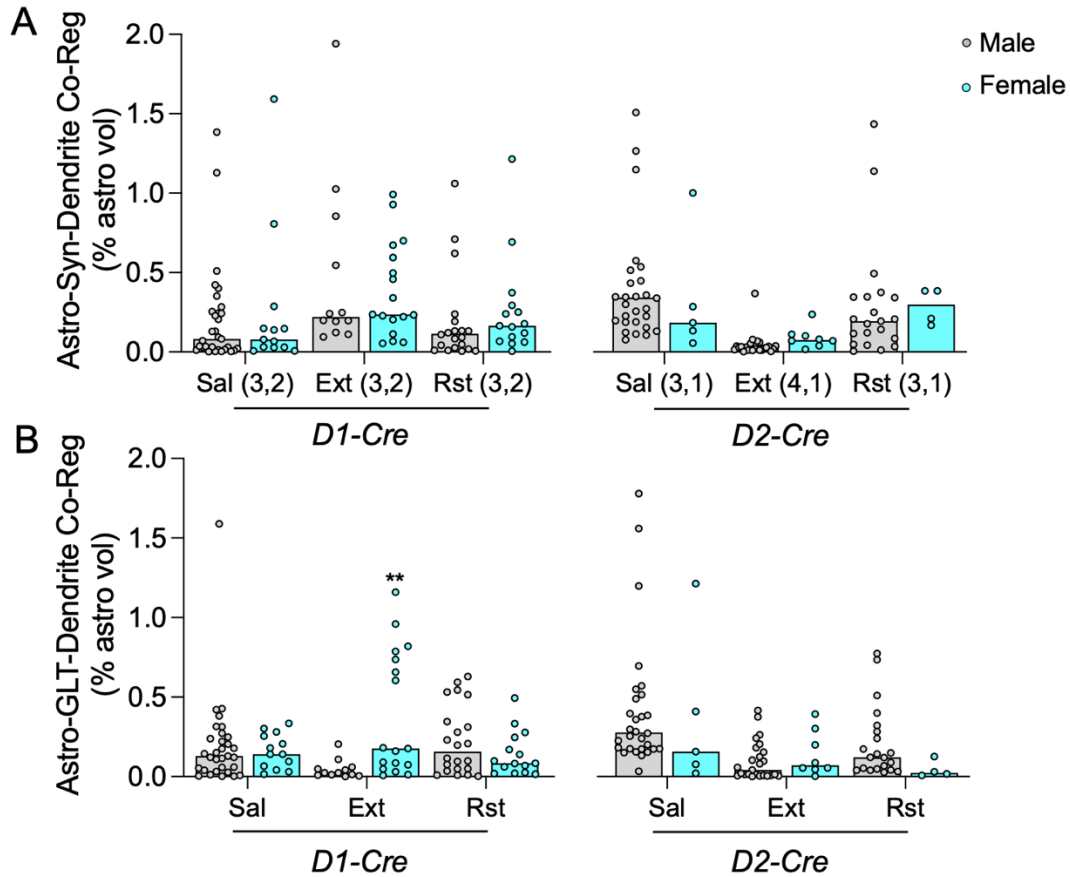

**Fig. S6. Cell-type specific dynamics in astrocyte-synapse and GLT-dendrite association are largely independent of sex.** (A) No sex differences were detected in D1- or D2-synaptic co-registration by NAc core astroglia after operant training with heroin (D1-Cre: Kruskal-Wallis=49.82,  $p < 0.0001$ , Dunn's post-hoc test for sex  $> 0.05$  for all treatments; D2-Cre: Kruskal-Wallis=13.05,  $p = 0.0229$ , Dunn's post-hoc test for sex  $> 0.05$  for all treatments). (B) Dendritic association of GLT-1 did not differ by sex, except in D1-Cre rats after extinction training (D1-Cre: Kruskal-Wallis=13.46,  $p = 0.0194$ ,  $**p < 0.01$  Male Ext vs. Female Ext; D2-Cre: Kruskal-Wallis=30.60,  $p < 0.0001$ , Dunn's post-hoc test for sex  $> 0.05$  for all treatments). Sal, yoked saline; Ext, extinguished; Rst, 15-min cued reinstatement. Animal N shown below bars in (A) as (male, female).

### ***Extinguished Heroin Seeking***

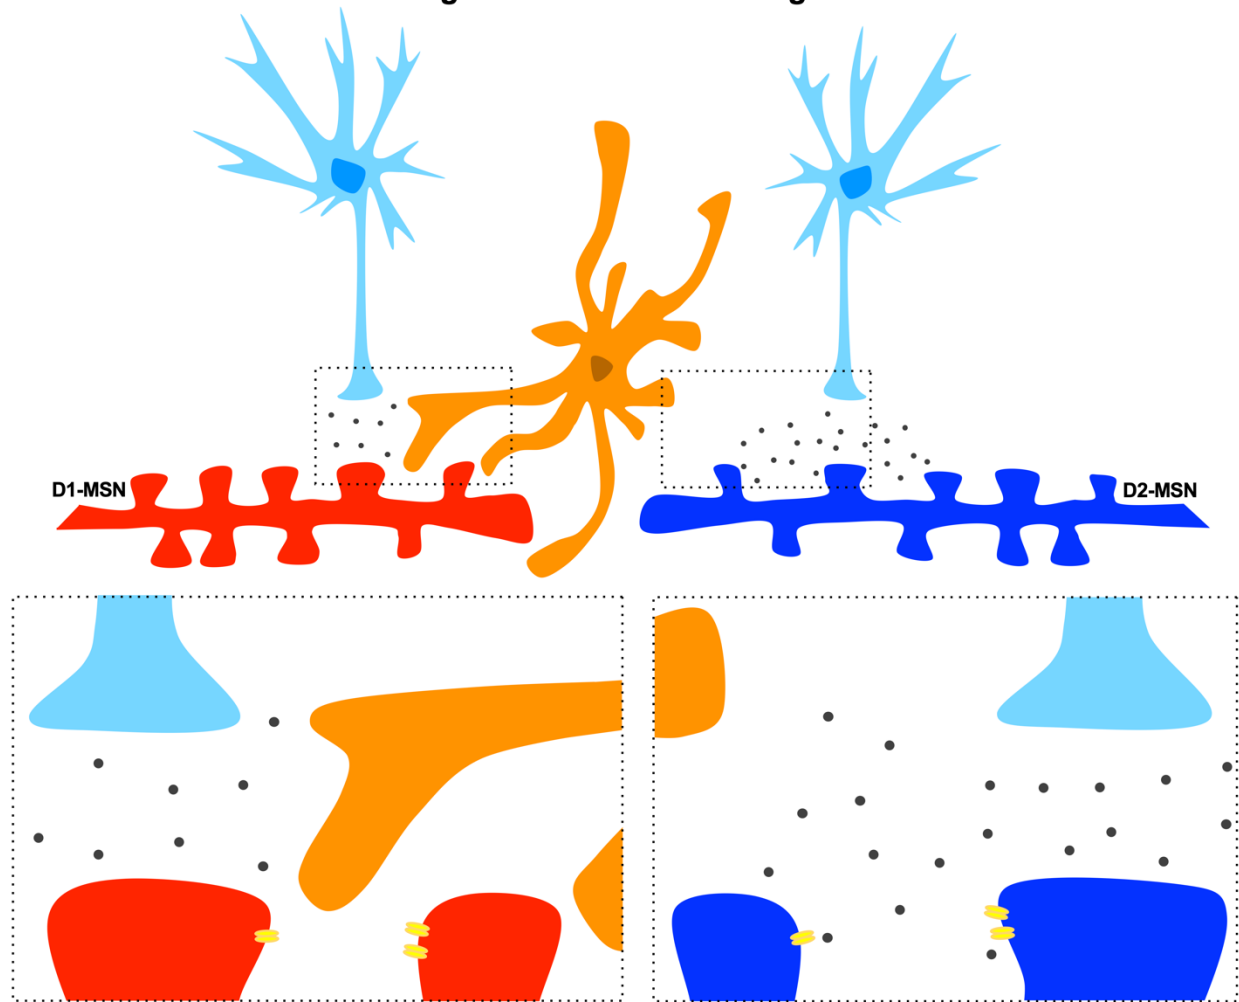

**Fig. S7. Synapse-selective proximity of astrocytes regulates seeking.** Extinguished heroin seeking is characterized by astrocytes exhibiting a high degree of association with synapses from D1-MSNs (left), but retraction from synapses from D2-MSNs (right). High synaptic co-registration by astroglial processes low in GLT-1 (orange) is predicted to induce autoinhibition through spatial buffering of glutamate toward presynaptic inhibitory autoreceptors (36). The high co-registration of astroglia with D1-MSN synapses during extinction training is also predicted to shield postsynaptic NR2B receptors (yellow) that produce postsynaptic potentiation when stimulated by glutamate (33). These two functions would suppress D1-MSN potentiation during extinction training. Instead, retraction from D2-MSNs after extinction of heroin seeking engages postsynaptic potentiation of D2-MSNs through stimulation of postsynaptic NR2B (33), synaptic



recruitment (41), and loss of autoinhibitory mechanisms at terminals synapsing onto D2-MSNs (36). These hypotheses are supported by data showing potentiation of D2-MSNs, but not D1-MSNs during extinction training (26, 46). Reversal of this pattern during cued reinstatement would permit potentiation of D1-MSNs and block signaling through D2-MSNs, permitting seeking behavior (10).

| D1-Cre                               |                                      |                                      |                                      |                                      |                                      | D2-Cre                               |                                      |                                      |                                      |                                      |                                      |
|--------------------------------------|--------------------------------------|--------------------------------------|--------------------------------------|--------------------------------------|--------------------------------------|--------------------------------------|--------------------------------------|--------------------------------------|--------------------------------------|--------------------------------------|--------------------------------------|
| Saline                               |                                      | Extinguished                         |                                      | Reinstated                           |                                      | Saline                               |                                      | Extinguished                         |                                      | Reinstated                           |                                      |
| Astro-Syn-Dendrite<br>Co-Reg (% vol) | Astro-GLT-Dendrite<br>Co-Reg (% vol) |
| 0.0300                               | 0.0076                               | 0.7001                               | 0.7365                               | 0.1932                               | 0.2788                               | 0.1307                               | 0.2724                               | 0.0287                               | 0.3753                               | 0.1782                               | 0.1425                               |
| 0.2456                               | 0.1780                               | 0.0605                               | 0.1774                               | 0.1327                               | 0.5443                               | 0.1984                               | 0.3842                               | 0.0155                               | 0.1248                               | 0.1163                               | 0.7739                               |
| 0.5098                               | 0.2482                               | 0.3413                               | 1.1587                               | 0.1322                               | 0.0502                               | 0.1127                               | 0.1744                               | 0.0455                               | 0.2622                               | 0.3429                               | 0.3991                               |
| 0.0305                               | 0.0043                               | 0.6727                               | 0.7868                               | 0.0913                               | 0.2309                               | 0.3452                               | 0.4887                               | 0.3680                               | 0.0975                               | 0.3757                               | 0.1197                               |
| 0.2540                               | 0.2729                               | 0.2288                               | 0.6566                               | 0.1210                               | 0.0947                               | 0.2270                               | 0.1807                               | 0.0200                               | 0.1809                               | 0.2075                               | 0.3220                               |
| 0.0708                               | 0.0527                               | 0.2227                               | 0.9594                               | 0.1350                               | 0.5158                               | 0.2557                               | 0.2551                               | 0.0304                               | 0.2420                               | 1.4346                               | 0.7354                               |
| 0.0123                               | 0.0277                               | 0.0679                               | 0.8191                               | 0.6213                               | 0.3455                               | 0.3475                               | 0.2966                               | 0.0368                               | 0.0078                               | 0.0115                               | 0.5105                               |
| 0.0155                               | 0.0398                               | 0.5954                               | 0.6045                               | 0.7099                               | 0.6298                               | 0.1069                               | 0.0336                               | 0.0127                               | 0.1029                               | 0.0477                               | 0.0883                               |
| 0.0144                               | 0.0020                               | 1.0266                               | 0.1080                               | 0.0482                               | 0.3122                               | 0.3589                               | 0.1326                               | 0.0151                               | 0.0145                               | 0.3453                               | 0.2403                               |
| 0.2441                               | 0.1499                               | 0.1108                               | 0.0421                               | 0.0080                               | 0.0475                               | 0.0768                               | 0.1742                               | 0.0294                               | 0.2039                               | 1.1386                               | 0.1740                               |
| 0.2063                               | 0.1212                               | 1.9399                               | 0.0129                               | 2.4966                               | 0.5931                               | 0.1889                               | 0.2818                               | 0.0124                               | 0.4163                               | 0.4940                               | 0.0402                               |
| 0.0212                               | 0.0581                               | 0.1929                               | 0.2035                               | 0.0837                               | 0.1153                               | 1.5075                               | 2.9899                               | 0.0388                               | 0.1537                               | 0.0353                               | 0.0314                               |
| 0.1315                               | 0.1291                               | 0.2483                               | 0.0004                               | 0.0262                               | 0.0093                               | 5.6845                               | 1.5592                               | 0.0611                               | 0.0035                               | 0.3478                               | 0.0415                               |
| 0.0793                               | 0.0665                               | 0.1987                               | 0.0241                               | 0.0108                               | 0.0082                               | 2.0164                               | 0.2007                               | 0.0687                               | 0.0054                               | 0.1945                               | 0.2818                               |
| 0.1483                               | 0.1803                               | 0.1978                               | 0.0131                               | 0.0059                               | 0.0021                               | 0.3009                               | 0.1548                               | 0.0110                               | 0.0584                               | 0.0424                               | 0.1492                               |
| 0.0067                               | 0.0151                               | 0.2338                               | 0.1819                               | 0.0194                               | 0.0102                               | 1.1487                               | 0.3968                               | 0.0391                               | 0.0448                               | 0.0847                               | 0.0475                               |
| 0.0293                               | 0.0416                               | 0.1124                               | 0.1596                               | 0.0432                               | 0.0984                               | 0.4489                               | 0.5708                               | 0.0705                               | 0.0551                               | 0.2491                               | 0.0681                               |
| 0.1392                               | 0.1404                               | 0.9283                               | 0.0909                               | 0.0108                               | 0.0757                               | 0.3398                               | 0.1734                               | 0.1116                               | 0.3930                               | 0.2068                               | 0.0527                               |
| 0.0670                               | 0.0305                               | 0.0538                               | 0.0847                               | 0.1098                               | 0.1977                               | 0.5152                               | 1.1983                               | 0.0172                               | 0.0019                               | 0.1428                               | 0.0393                               |
| 0.4016                               | 0.2204                               | 0.2374                               | 0.0477                               | 3.9462                               | 0.2067                               | 0.2718                               | 0.3590                               | 0.0710                               | 0.1988                               | 0.1213                               | 0.1213                               |
| 0.2838                               | 0.4279                               | 0.9920                               | 0.0307                               | 0.2386                               | 0.0353                               | 0.2250                               | 0.1535                               | 0.1009                               | 0.0544                               | 0.0052                               | 0.0276                               |
| 1.1285                               | 0.3126                               | 0.4975                               | 0.0118                               | 1.0601                               | 0.5309                               | 1.2654                               | 0.5146                               | 0.2368                               | 0.0877                               | 0.3853                               | 0.0165                               |
| 0.3527                               | 0.2036                               | 0.2042                               | 0.0075                               | 0.0956                               | 0.1388                               | 2.2984                               | 1.7794                               | 0.0798                               | 0.3014                               | 0.3851                               | 0.1269                               |
| 0.0352                               | 0.1150                               | 0.4574                               | 0.0740                               | 0.3731                               | 0.2772                               | 0.5759                               | 0.1510                               | 0.0544                               | 0.0044                               | 0.1684                               | 0.0301                               |
| 0.0048                               | 0.1748                               | 0.5457                               | 0.0033                               | 0.2509                               | 0.2463                               | 0.1536                               | 0.5491                               | 0.0236                               | 0.0132                               | 0.2111                               | 0.0072                               |
| 0.0941                               | 0.3145                               | 0.2411                               | 0.0600                               | 0.2393                               | 0.0616                               | 0.1875                               | 0.2406                               | 0.0797                               | 0.0416                               |                                      |                                      |
| 0.2877                               | 0.2814                               | 0.1222                               | 0.0089                               | 0.1581                               | 0.0183                               | 0.3488                               | 0.2252                               | 0.0117                               | 0.0136                               |                                      |                                      |
| 0.0284                               | 0.2051                               | 0.8550                               | 0.0477                               | 0.0052                               | 0.0247                               | 0.4335                               | 0.3767                               | 0.0328                               | 0.0070                               |                                      |                                      |
| 1.5922                               | 0.3352                               | 0.0949                               | 0.0229                               | 0.6927                               | 0.4945                               | 0.5357                               | 0.6957                               | 0.0184                               | 0.0157                               |                                      |                                      |
| 0.8063                               | 0.2548                               |                                      |                                      | 0.1775                               | 0.1694                               | 0.1224                               | 0.1730                               | 0.0357                               | 0.0801                               |                                      |                                      |
| 0.1473                               | 0.3016                               |                                      |                                      | 1.2145                               | 0.3333                               | 0.2860                               | 1.2131                               | 0.0293                               | 0.0202                               |                                      |                                      |
| 0.0076                               | 0.0951                               |                                      |                                      | 0.0673                               | 0.0841                               | 0.1845                               | 0.4097                               | 0.0047                               | 0.0005                               |                                      |                                      |
| 0.0311                               | 0.1405                               |                                      |                                      | 0.1652                               | 0.0209                               | 0.0565                               | 0.0780                               | 0.0023                               | 0.0039                               |                                      |                                      |
| 0.4217                               | 1.5885                               |                                      |                                      | 0.0536                               | 0.0818                               | 0.1340                               | 0.0199                               |                                      |                                      |                                      |                                      |
| 1.3833                               | 0.3813                               |                                      |                                      | 0.1204                               | 0.0696                               | 1.0013                               | 0.1578                               |                                      |                                      |                                      |                                      |
| 0.2289                               | 0.4215                               |                                      |                                      | 0.0628                               | 0.0153                               |                                      |                                      |                                      |                                      |                                      |                                      |
| 0.1299                               | 0.1208                               |                                      |                                      | 0.2941                               | 0.0977                               |                                      |                                      |                                      |                                      |                                      |                                      |
| 0.0039                               | 0.1085                               |                                      |                                      |                                      |                                      |                                      |                                      |                                      |                                      |                                      |                                      |
| 0.0373                               | 0.1434                               |                                      |                                      |                                      |                                      |                                      |                                      |                                      |                                      |                                      |                                      |
| 0.0312                               | 0.0317                               |                                      |                                      |                                      |                                      |                                      |                                      |                                      |                                      |                                      |                                      |
| 0.0822                               | 0.2388                               |                                      |                                      |                                      |                                      |                                      |                                      |                                      |                                      |                                      |                                      |
| 0.0097                               | 0.0025                               |                                      |                                      |                                      |                                      |                                      |                                      |                                      |                                      |                                      |                                      |
| 0.0040                               | 0.0594                               |                                      |                                      |                                      |                                      |                                      |                                      |                                      |                                      |                                      |                                      |
| 0.0021                               | 0.0123                               |                                      |                                      |                                      |                                      |                                      |                                      |                                      |                                      |                                      |                                      |

**Table S1. Dendrite-specific co-registration values.** Triple co-registration of astroglia with Synapsin I and labeled dendrites, as well as triple co-registration of astroglia with GLT-1 and labeled dendrites from D1- and D2-Cre rats are presented as % astrocyte volume.
